## Jet flow in hydraulic-jump-stepped spillways: experimental study

Yu Zhou <sup>a</sup>, Jianhua Wu <sup>b,\*</sup>, Fei Ma<sup>b</sup>, Jianyong Hu<sup>c</sup> and Jianfen Zhou<sup>d</sup>

<sup>a</sup> Key Laboratory for Technology in Rural Water Management of Zhejiang Province, Zhejiang University of Water Resources and Electric Power, Hangzhou 310018, China

<sup>b</sup> College of Water Conservancy and Hydropower Engineering, Hohai University, Nanjing 210098, China

<sup>c</sup> Zhejiang Institute of Water Resources and Ocean Engineering, Zhejiang University of Water Resources and Electric Power, Hangzhou 310018, China

<sup>d</sup> College of Water Conservancy and Environmental Engineering, Zhejiang University of Water Resources and Electric Power, Hangzhou 310018, China

\*Corresponding author. E-mail: jhwu@hhu.edu.cn

 YZ, 0000-0002-5082-4345; JW, 0000-0003-1346-9046

### ABSTRACT

A hydraulic-stepped spillway was designed using an aeration basin to provide aerated flow to the stepped spillway utilizing a hydraulic jump. However, the flow through the entrance of the stepped spillway might separate from the first step top and impact the downstream steps at a large unit discharge, causing a so-called jet flow. A new experimental study was conducted to better understand the jet flow in the hydraulic-jump-stepped spillway with comparisons with conventional stepped spillways. The results showed that the critical condition required for the formation of the jet flow was close to the geometric parameters of the upstream aeration basin. Among these parameters, the height of the reverse step had a more significant effect on the local flow pattern, thus lowering the risk of jet flow. The relationships between the critical condition and the geometry of the aeration basin suggested that the Froude number at the entrance of the stepped spillway was the key parameter forming the jet flow. Compared with conventional stepped spillways, the hydraulic-jump-stepped spillway could effectively extend the practical application for large unit discharges by providing a better understanding of jet flow conditions.

**Key words:** aeration basin, critical condition, entrance of the stepped spillway, hydraulic-jump-stepped spillway, jet flow

### HIGHLIGHTS

- A jet flow for large unit discharges in a hydraulic-jump-stepped spillway.
- Investigation of the critical condition of the jet flow as compared with conventional stepped spillways.
- The critical condition affected by the geometry of the aeration basin.
- An effective element to smooth the surface profile.
- A linear relation between the critical condition and the Froude number at the brink of the first step.

## GRAPHICAL ABSTRACT

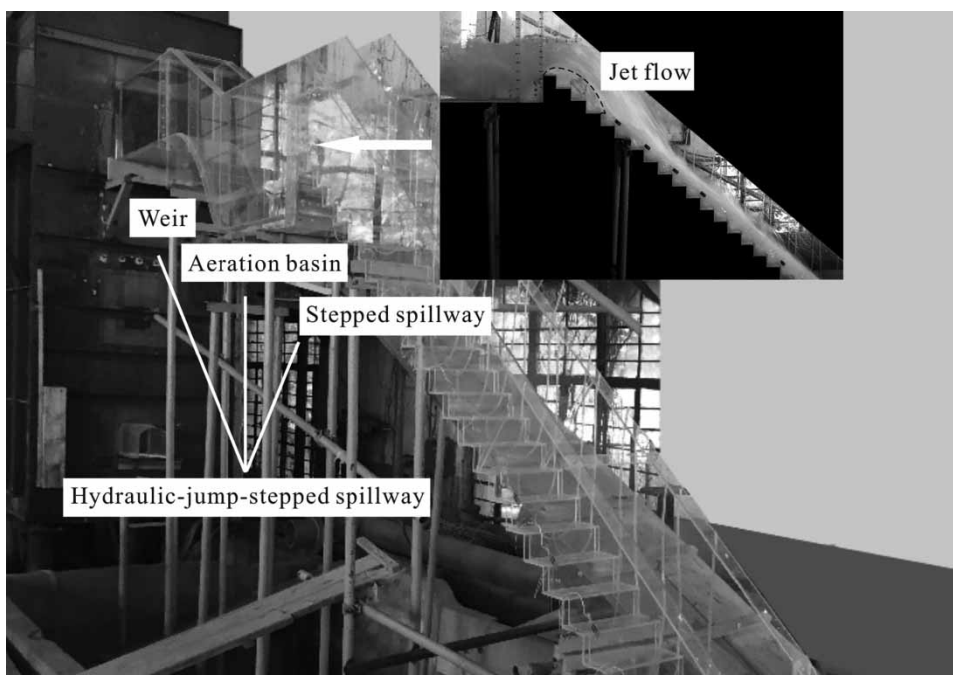

## INTRODUCTION

Stepped spillways have become increasingly popular flood-release structures that can dissipate the energy of high-velocity flow (Boes & Hager 2003a, 2003b; Stojnic *et al.* 2021). With the increase in the unit discharge, the flow conditions in stepped spillways are classified as three typical flow patterns, i.e., nappe flow, transition flow, and skimming flow (Chamani & Rajaratnam 1999; Renna & Fratino 2010; Biethman *et al.* 2021). In nappe flow, the water bounces from one step to another, with the steps acting as a succession of free-falling nappes. In skimming flow, the water flows down the spillway as a coherent stream, skimming over the step edges and being cushioned by the recirculating vortices trapped between the mainstream and the steps. The disappearance of the cavity beneath the free-falling nappes indicates the onset of the skimming flow. In addition to the three typical flow patterns, there are some special flow patterns (e.g., water fins, spray flow, shooting flow, and water droplets) observed locally due to the step geometry of stepped spillways (Han *et al.* 2006; Pfister *et al.* 2006b; Zare & Doering 2012; Hunt & Kadavy 2017). The resultant cavity (i.e., cavity flow, a separation bubble or roller) may induce improper flow behavior, resulting in cavitation damage, structure erosion, flow instability, and the reduction of over-flow discharge (Yu *et al.* 2008; Wang & Chen 2009; Amromin 2018; Wehrmeister & Ota 2021). In addition, stepped spillways are now used in newly built dams with a combination of upstream apparatuses, such as flaring gate piers, a labyrinth weir, a piano key weir, a deflector, a step aerator, and a ski jump aeration basin (Pfister *et al.* 2006a; Silvestri *et al.* 2013; Qian *et al.* 2016; Dong *et al.* 2019; Tullis *et al.* 2021; Terrier *et al.* 2022). For these new types of stepped spillways, the resultant jet flow and cavity will occur locally for some circumstances compared with conventional stepped spillways with ogee-crested weirs and flat steps.

Given that the inception point of the air entrainment moves downstream with increasing unit discharge, a backwater reach for large unit discharges is prone to cavitation damage, and the maximum unit discharge of a conventional stepped spillway is restricted to 50–60 m<sup>2</sup>/s at a prototype-scale (Chanson 2015). We have proposed a hydraulic-jump-stepped spillway (HJSS) that increased the unit discharge by 100 m<sup>2</sup>/s in prototype (Wu *et al.* 2018; Zhou *et al.* 2020, 2021). Figure 1 shows a definition sketch of the HJSS, which consisted of a weir, an aeration basin, and a stepped spillway. The aeration basin used in this study supplied the aerated flow to the stepped spillway utilizing a hydraulic jump. However, with the increasing unit discharge, the flow through the entrance of the stepped spillway might separate from the first step top and impact the downstream steps with a large unit discharge, causing a jet flow.

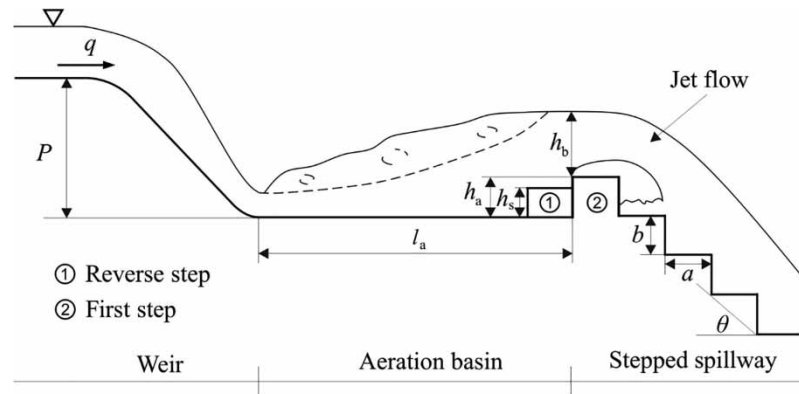

**Figure 1** | Definition sketch of the hydraulic-jump-stepped spillway (HJSS).

Therefore, the main objective of the study was to experimentally investigate the jet flow in a hydraulic-jump-stepped spillway (HJSS) as compared with a conventional stepped spillway. Our intent was to analyze the critical condition for the onset of the jet flow. In this analysis, the hydraulic parameters and geometric parameters of the aeration basin were used to propose an empirical equation based on the experimental data.

## EXPERIMENTAL SETUP AND METHODOLOGY

### Experimental setup

All of the experiments were conducted at the High Speed Flow Laboratory in Hohai University. The experimental setup consisted of a pump, an approach conduit, a large feeding basin, a test model, and a flow return system. The test model included an approach flow channel, a weir, an aeration basin, a stepped spillway, and a tailwater channel, and their widths  $B$  were all 0.275 m (Figure 2). The physical model, made of Perspex, was designed at a scale of 1:40 according to an existing stepped spillway project based on the Froude similarity criterion.

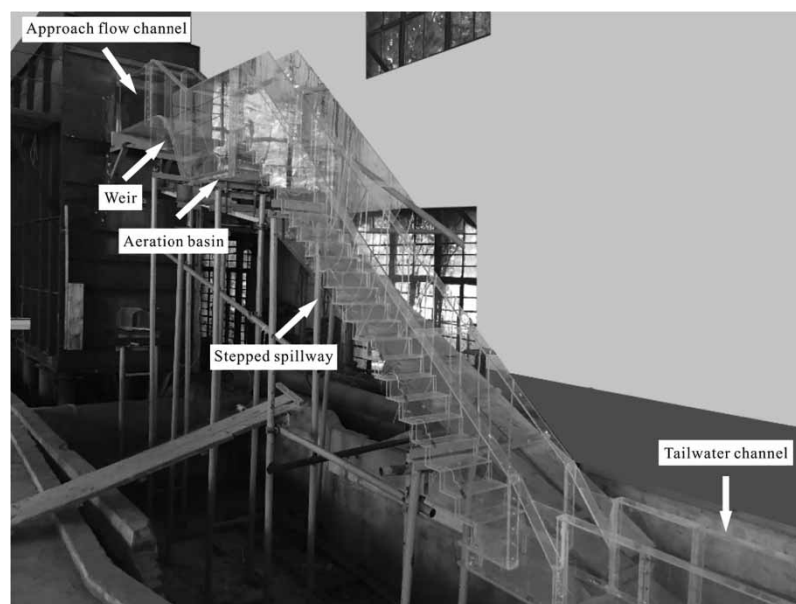

**Figure 2** | Experimental setup.

The approach flow channel was 1.0 m long. The weir was a standard Waterways Experiment Station (WES) weir with the profile of  $y = 1.1255x^{1.85}$ . The height from the crest of the weir to the bottom of the aeration basin  $P$  was 0.63 m; the slope of the overflow surface was 1V:0.75H, and the toe of the weir was connected to the bottom of the aeration basin by an ogee curve with a radius of 0.275 m. The aeration basin upstream of the stepped spillway was added to provide the aerated flow for the stepped spillway, with  $l_a$  and  $h_a$  being the length and the height of the aeration basin, respectively. The stepped spillway was made up of 24 steps. The single step length  $a$  was 0.11 m, the single step height  $b$  was 0.09 m, and the stepped spillway slope  $\theta$  was  $39.3^\circ$ . To stabilize the flow in the aeration basin, a reverse step was added with the same length and width as the downstream single step, with  $h_s$  being the height of the reverse step.

### Experimental methodology

The discharges were measured by a V-notch weir downstream of the test model with a relative error below 2%. The flow depth  $h_b$  upstream of the first step brink was measured by a point gauge, resulting in the Froude number  $Fr_b$  at the brink  $Fr_b = Q/(Bh_b^{3/2}g^{1/2})$ , with  $g$  being the acceleration of gravity. The visual observation of flow patterns and the hydraulic data measurements were carried out for a wide range of unit discharges,  $0.036 \leq q \leq 0.403 \text{ m}^2/\text{s}$  (i.e., the relative critical flow depths of  $0.56 \leq h_c/b \leq 2.83$ , corresponding to a Reynolds number  $Re > 2 \times 10^4$  and a Weber number  $We > 100$ ). Therefore, the scale effects associated with the flow behaviors should be negligible, according to Boes & Hager (2003a). In this study, we focused on the flow through the entrance of the stepped spillway, with particular emphasis on the effect of the aeration basin. The detailed geometric parameters of these experimental cases are listed in Table 1. The critical condition for the onset of the jet flow ( $h_c/b$ ,  $Fr_b$ ), along with the relevant  $Fr$  and  $We$ , is also listed in Table 1.

**Table 1** | Experimental cases and geometric parameters of the aeration basin and the critical condition for the onset of the jet flow

| Cases | $l_a$ ( $10^{-2}$ m) | $h_a$ ( $10^{-2}$ m) | $h_s$ ( $10^{-2}$ m) | $(h_c/b)_{\text{cri}}$ | $(Fr_b)_{\text{cri}}$ | $Re$ ( $10^4$ ) | $We$ ( $10^2$ ) |
|-------|----------------------|----------------------|----------------------|------------------------|-----------------------|-----------------|-----------------|
| M111  | 87.5                 | 18.0                 | 0                    | 1.24                   | 0.41                  | 11.60           | 9.32            |
| M112  | 87.5                 | 18.0                 | 4.5                  | 1.46                   | 0.51                  | 14.76           | 14.80           |
| M113  | 87.5                 | 18.0                 | 9.0                  | 1.84                   | 0.77                  | 20.95           | 30.96           |
| M114  | 87.5                 | 18.0                 | 13.5                 | 2.34                   | 0.82                  | 30.12           | 52.65           |
| M121  | 87.5                 | 27.0                 | 0                    | 0.96                   | 0.20                  | 7.91            | 3.43            |
| M122  | 87.5                 | 27.0                 | 4.5                  | 1.14                   | 0.26                  | 10.18           | 5.75            |
| M123  | 87.5                 | 27.0                 | 9.0                  | 1.30                   | 0.36                  | 12.38           | 9.21            |
| M124  | 87.5                 | 27.0                 | 13.5                 | 1.50                   | 0.49                  | 15.46           | 15.28           |
| M211  | 105.0                | 18.0                 | 0                    | 1.34                   | 0.38                  | 13.00           | 10.32           |
| M212  | 105.0                | 18.0                 | 4.5                  | 1.70                   | 0.49                  | 18.67           | 19.81           |
| M213  | 105.0                | 18.0                 | 9.0                  | 2.11                   | 0.67                  | 25.69           | 37.07           |
| M214  | 105.0                | 18.0                 | 13.5                 | 2.41                   | 0.65                  | 31.44           | 47.80           |
| M221  | 105.0                | 27.0                 | 0                    | 1.02                   | 0.43                  | 8.71            | 6.52            |
| M222  | 105.0                | 27.0                 | 4.5                  | 1.20                   | 0.42                  | 11.05           | 8.81            |
| M223  | 105.0                | 27.0                 | 9.0                  | 1.39                   | 0.34                  | 13.75           | 10.32           |
| M224  | 105.0                | 27.0                 | 13.5                 | 1.67                   | 0.42                  | 18.13           | 17.01           |
| M311  | 122.5                | 18.0                 | 0                    | 1.69                   | 0.59                  | 18.40           | 21.92           |
| M312  | 122.5                | 18.0                 | 4.5                  | 1.96                   | 0.68                  | 23.08           | 32.55           |
| M313  | 122.5                | 18.0                 | 9.0                  | 2.43                   | 0.74                  | 31.82           | 52.63           |
| M314  | 122.5                | 18.0                 | 13.5                 | 2.83                   | 0.87                  | 40.05           | 80.08           |
| M321  | 122.5                | 27.0                 | 0                    | 1.20                   | 0.41                  | 11.05           | 8.67            |
| M322  | 122.5                | 27.0                 | 4.5                  | 1.36                   | 0.41                  | 13.31           | 11.07           |
| M323  | 122.5                | 27.0                 | 9.0                  | 1.63                   | 0.69                  | 17.46           | 22.60           |
| M324  | 122.5                | 27.0                 | 13.5                 | 2.07                   | 0.57                  | 25.02           | 32.06           |

## RESULTS AND DISCUSSION

### Flow patterns

For the conventional stepped spillway, the hydraulic condition for the formation of each flow pattern was expressed by the ratio of the critical flow depth ( $h_c$ ) to the step height  $b$ . The onset of skimming flow can be predicted by Boes & Hager (2003b):

$$\frac{h_c}{b} = 0.91 - 0.14 \tan \theta \quad (1)$$

Substituting  $\theta = 39.3^\circ$  (the same as the stepped spillway slope of the HJSS) into Equation (1), the critical  $h_c/b$  for the onset of skimming flow in the conventional stepped spillway was equal to 0.80. A skimming flow was always observed in the conventional stepped spillway when  $h_c/b > 0.8$  according to the variation of the flow patterns.

Figure 3 shows the flow patterns over the stepped spillway of the HJSS at different dimensionless unit discharges for case M211. At  $h_c/b = 0.76$  and 1.17, a nappe flow and skimming flow were observed along the stepped spillway, as shown in Figure 3(a) and 3(b), respectively. From that moment, the flow pattern over the stepped spillway was similar to the conventional stepped spillway. At  $h_c/b = 1.37$ , the aeration basin upstream acted as a deflector. The flow separated from the top of the first step and entered the downstream steps in the form of a jet, as seen in Figure 3(c). With the further increase in the unit discharge, the cavity expanded, as shown in Figure 3(d). The separated jet directly bypassed the several steps and impacted the foregoing steps. Moreover, the jet flow resulted in significant air entrainment and impacted the downstream steps. Some instabilities, water level rises, and erosion on the steps were observed in the jet impact region, although the flow quickly regained stability and skimmed over the steps along the pseudo-bottom (i.e., skimming flow). Furthermore, compared with the conventional stepped spillway, a local jet flow was also observed at large unit discharges in other cases of the HJSS. From a practical point of view, this local jet flow should be avoided.

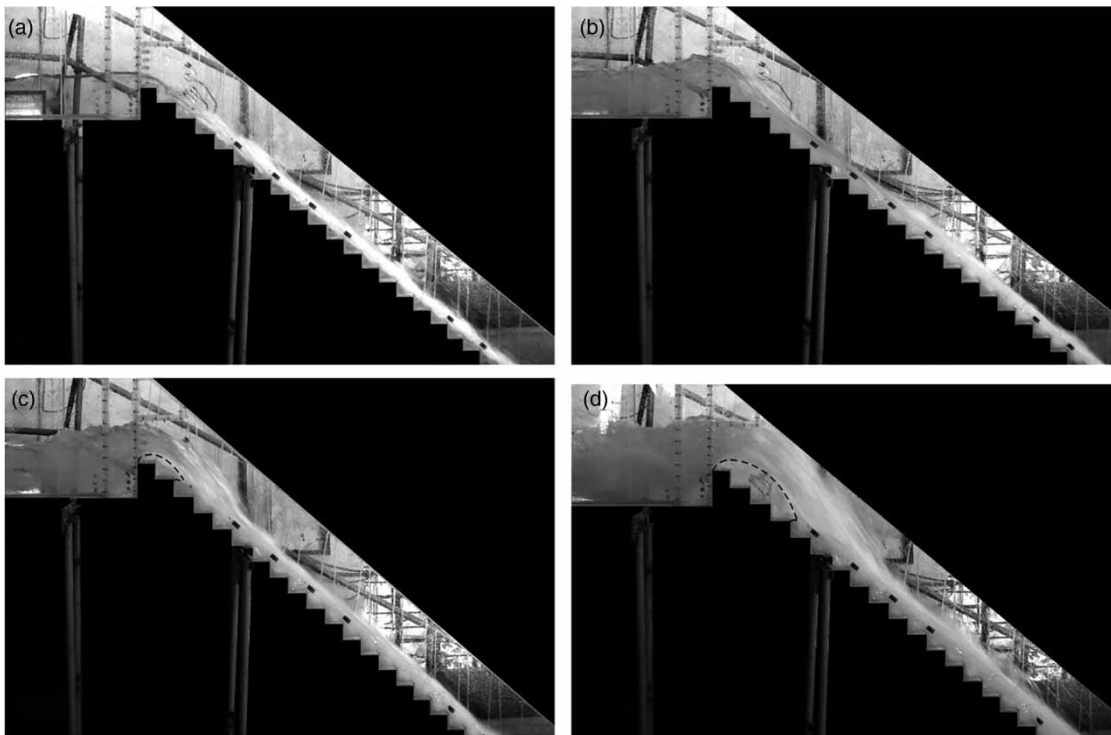

**Figure 3** | Flow patterns over the stepped spillway of the HJSS at different  $h_c/b$  for case M211: (a)  $h_c/b = 0.76$ ; (b)  $h_c/b = 1.17$ ; (c)  $h_c/b = 1.37$ ; (d)  $h_c/b = 1.60$ .

### Reverse step effect

For the HJSS, the reverse step added in the aeration basin affected the flow patterns over the stepped spillway. Figure 4 shows the flow patterns with a reverse step at different  $h_c/b$  for case M213, which merely added a reverse step as compared with case M211 in Figure 3.

It was observed that, for any  $h_c/b$ , the local flow pattern on the stepped spillway with a reverse step in the aeration basin always adhered to the top of the first step, and the jet flow appeared to be nonexistent. Compared with the flow pattern for case M211, for an identical inflow condition of  $h_c/b = 0.76$  and  $1.17$ , the flow patterns with and without a reverse step were similar. However, when  $h_c/b$  increased to  $1.37$  and  $1.60$ , the flow through the first step without a reverse step exhibited a local jet flow.

Furthermore, the height of the reverse step also had a significant effect on the flow pattern, as shown in Figure 5. For case M213, the flow began to detach from the top of the first step when  $h_c/b$  equaled  $2.13$  (Figure 5(a)), whereas the water surface profile for case M214 seemed to be smooth for the conditions of the higher reverse step height (Figure 5(b)). The reverse step, as an effective method to smooth the water surface profile, changed the angle of the streamline at the entrance section with a horizontal flat step (Tajabadi *et al.* 2018). The commonly used method of smoothing the water surface profile involves adding an inserted apparatus, e.g., the step edge arrangements in the stepped spillway proposed by Pfister *et al.* (2006b) as shown in Figure 6. Obviously, the flow through the first step had to separate in the HJSS. There was a critical condition for the onset of the jet flow when  $h_c/b$  increased to some extent, regardless of the geometry of the aeration basin.

### Critical conditions of jet flow

As mentioned above, if the unit discharge increased to some extent, the flow through the first step of the HJSS would exhibit a local jet flow. There was a critical hydraulic condition  $(h_c/b)_{\text{cri}}$  required for the formation of the jet flow, and the jet flow occurred once  $(h_c/b) > (h_c/b)_{\text{cri}}$ . Figure 7 shows the critical condition  $(h_c/b)_{\text{cri}}$  with different reverse step heights in the aeration basin.

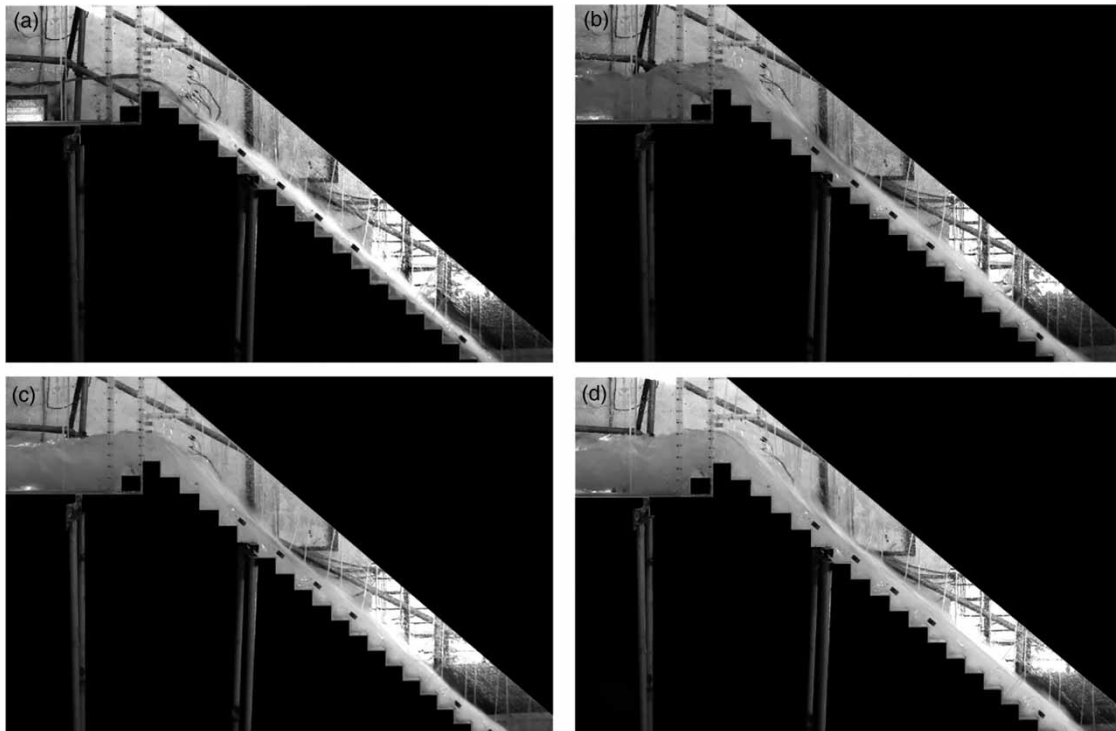

**Figure 4** | Flow through the first step with a reverse step in the aeration basin at different  $h_c/b$  for case M213: (a)  $h_c/b = 0.76$ ; (b)  $h_c/b = 1.17$ ; (c)  $h_c/b = 1.37$ ; (d)  $h_c/b = 1.60$ .



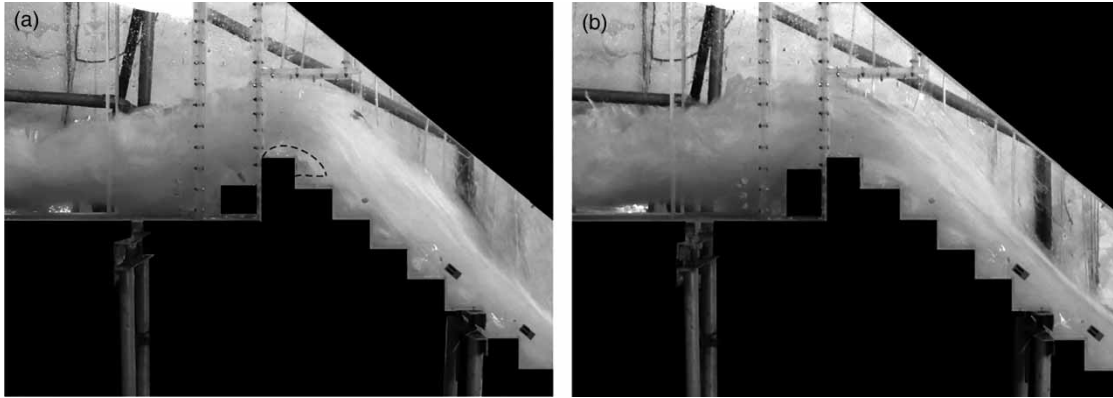

**Figure 5** | Flow through the first step with different heights of reverse steps at  $h_c/b = 2.13$ : (a) case M213; (b) case M214.

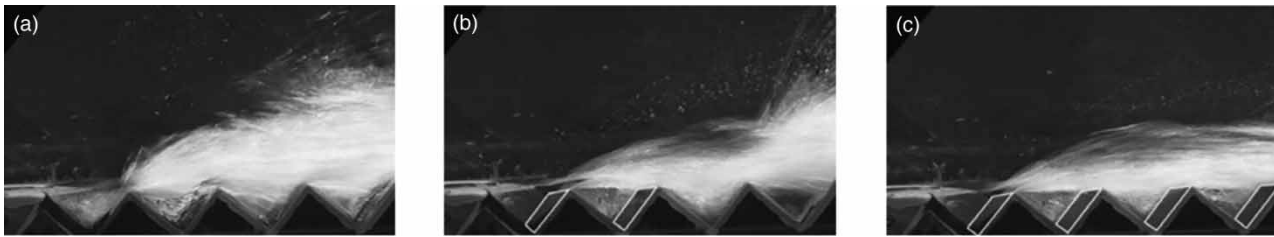

**Figure 6** | Local flow patterns over stepped spillways with different step edge arrangements in foregoing steps for  $n =$  (a) 0, (b) 2, (c) 5 and  $h_c/b = 0.59$  (Pfister et al. 2006b).

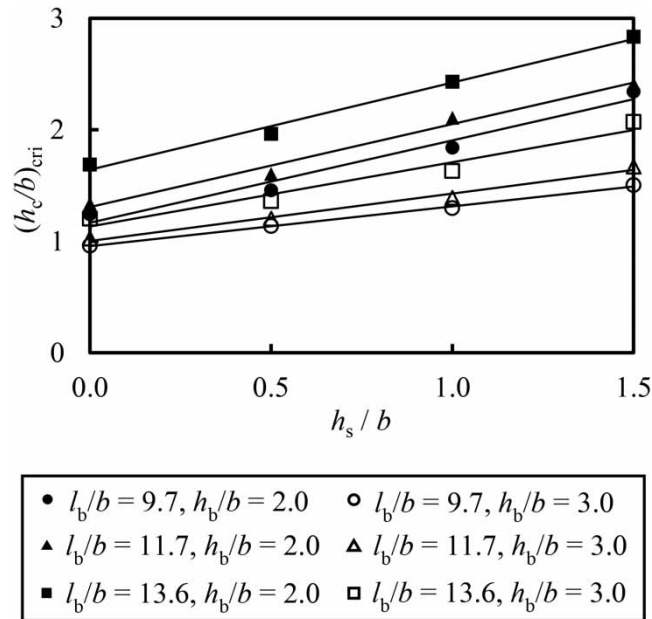

**Figure 7** | Critical conditions of the HJSS with different reverse step heights in the aeration basin.

Clearly, all critical conditions  $(h_c/b)_{cri}$  for the jet flow formation increased with the relative height of the reverse step ( $h_s/b$ ) in the aeration basin regardless of the relative length ( $l_a/b$ ) or relative height ( $h_a/b$ ) of the aeration basin, and their trend had a roughly similar growth rate. As shown in this figure, the value of  $(h_c/b)_{cri}$  increased with increasing  $l_a/b$  and decreasing  $h_a/b$ .

Utilizing the multiple linear regression method and based on the experimental data, we can obtain Equation (2) by considering the geometric parameters of the aeration basin, as shown in Figure 8.

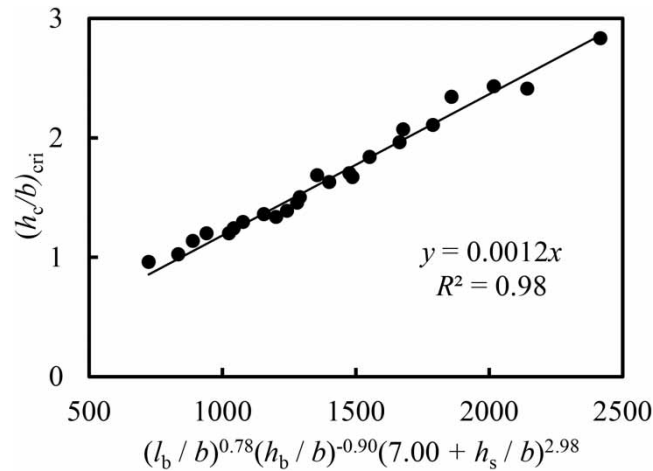

**Figure 8** | Variation of  $(h_c/b)_{\text{cri}}$  with  $(l_a/b)^{0.78}(h_a/b)^{-0.90}(7.00 + h_s/b)^{2.98}$ .

$$(h_c/b)_{\text{cri}} = 0.0012 \left( \frac{l_b}{b} \right)^{0.78} \left( \frac{h_b}{b} \right)^{-0.90} \left( 7.00 + \frac{h_s}{b} \right)^{2.98}, R^2 = 0.98 \quad (2)$$

where  $9.7 \leq l_a/b \leq 13.6$ ,  $2.0 \leq h_a/b \leq 3.0$  and  $0 \leq h_s/b \leq 1.5$ . Equation (2) reflects not only the relationship between the critical conditions and geometric parameters of the aeration basin (i.e.,  $(h_c/b)_{\text{cri}}$  increased with increasing  $l_a/b$  and  $h_s/b$ , but decreased with increasing  $h_a/b$ ), but also the magnitude of the effect of these parameters. The relative reverse step height  $h_s/b$  had a greater effect on the critical conditions  $(h_c/b)_{\text{cri}}$  than the other geometric parameters of the aeration basin. The reverse step proved useful for smoothing the water surface profile.

To integrate the influence of the geometric parameters of the aeration basin into the inflow of the stepped spillways, Figure 9 summarizes the experimental results regarding the onset of the jet flow as a function of the Froude number at the brink of the first step ( $Fr_b$ ). The critical condition  $(h_c/b)_{\text{cri}}$  can be expressed as:

$$(h_c/b)_{\text{cri}} = 2.45Fr_b + 0.37, \text{ for } 0.1 \leq Fr_b \leq 0.9, R^2 = 0.78 \quad (3)$$

As seen in Figure 9, for the HJSS, with the increasing  $Fr_b$ ,  $(h_c/b)_{\text{cri}}$  increased, and the relationship appeared to be linear. For the conventional stepped spillway, the hydraulic conditions required for the formation of the jet flow were defined as follows (Chanson 1996):

$$(h_c/b)_{\text{cri}} = \frac{Fr_b^{2/3} \sqrt{1 + \frac{1}{Fr_b^2}}}{\sqrt{1 + 2 \cdot Fr_b^2 \cdot \left( 1 + \frac{1}{Fr_b^2} \right)^{3/2} \left( 1 - \frac{\cos \theta_b}{\sqrt{1 + \frac{1}{Fr_b^2}}} \right)}} \quad (4)$$

where  $\theta_b$  is the initial angle of the streamlines in the horizontal direction, and the jet flow occurred for  $h_c/b < (h_c/b)_{\text{cri}}$ . Because the stepped spillway of the HJSS was similar to the conventional stepped spillway for the flat crest, by substituting  $\theta_b = 0$  into Equation (4), a linear form between  $(h_c/b)_{\text{cri}}$  and  $(Fr_b)$  can be obtained in Equation (5) as follows (Figure 9):

$$(h_c/b)_{\text{cri}} = 0.38Fr_b + 0.49, \text{ for } 0.1 \leq Fr_b \leq 0.9, R^2 = 0.99 \quad (5)$$

The data for this study and those of Chanson (1996) both had the linear relation. This indicated that the risk of flow deflection at the first step for the HJSS could be reduced by increasing the step height, contrary to the conventional stepped spillway



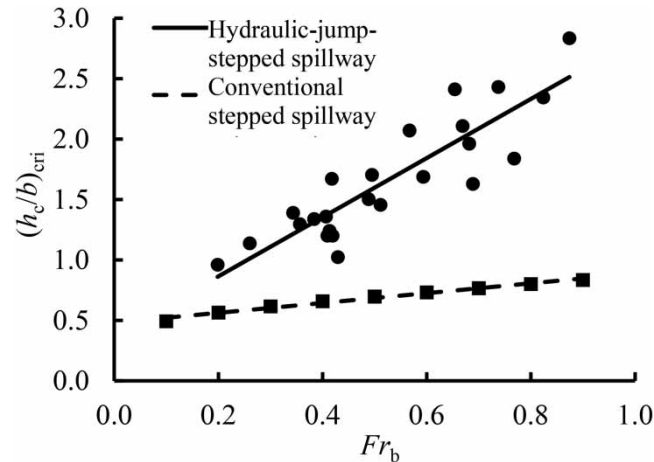

**Figure 9** | Variation of  $(h_c/b)_{cri}$  with  $Fr_b$ .

at a given unit discharge. The difference between the two curves was larger as  $Fr_b$  increased, which further reveals the appearance of the jet flow at larger unit discharge in the HJSS, whereas for small unit discharges in the conventional stepped spillway, both Equations (3) and (5) reveal that the jet flow could be attributed to the Froude number  $Fr$  at the entrance of the stepped spillway.

Although the aeration basin upstream of the stepped spillway increased the risk of flow deflection for large unit discharges, the resultant aerated flow might reduce the risk of cavitation damage of the non-aerated flow region of the stepped spillway (Wu *et al.* 2018; Zhou *et al.* 2021). In future research on the HJSS, it will be important to focus on the air concentration, velocity profiles, and other hydraulic performances by numerical simulations.

## CONCLUSION

For the hydraulic-jump-stepped spillway we proposed, the jet flow near the entrance of the stepped spillway with a large unit discharge was experimentally investigated. The critical condition for the formation of the jet flow increased with the increase in the length of the aeration basin and the height of the reverse step in the aeration basin, but the critical condition decreased with the increase in the height of the aeration basin. The height of the reverse step height was more effective in lowering the risk of jet flow. By integrating the influence of the geometric parameters of the aeration basin into the inflow condition of the stepped spillway, a linear relationship could be obtained, i.e., the occurrence of jet flow in the hydraulic-jump-stepped spillway could be attributed to the Froude number at the entrance of the stepped spillway. Compared with conventional stepped spillways, the hydraulic-jump-stepped spillway could effectively extend the practical application in large unit discharges with the knowledge of jet flow conditions. Research is ongoing on the hydraulic performance of a hydraulic-jump-stepped spillway with numerical methods.

## ACKNOWLEDGEMENTS

This research is supported by the National Natural Science Foundation of China (Grant No. 51479057), the Joint Funds of the Zhejiang Provincial Natural Science Foundation of China (Grant No. LZJWZ22E090004), the Open Funding of the Key Laboratory for Technology in Rural Water Management of Zhejiang Province (Project No. ZJWEU-RWM-20200103B), the Science and Technology Project of Zhejiang Water Resources Department (RA1904, RB2119, RC2142 and RC2143) and the General Research Project of Zhejiang Provincial Department of Education (Y202045107).

## DECLARATION OF COMPETING INTEREST

The authors declare no conflicts of interest.

## DATA AVAILABILITY STATEMENT

All relevant data are included in the paper or its Supplementary Information.

## REFERENCES

- Amromin, E. 2018 Prediction of cavitation inception within regions of flow separation. *Journal of Fluids Engineering* **140** (1), 011103. <https://doi.org/10.1115/1.4037505>.
- Biethman, B., Ettema, R., Thornton, C., Hogan, T. & Lan, Y. 2021 Air entrained in flow along a steep-stepped spillway: data and insights from a hydraulic model. *Journal of Hydraulic Engineering* **147** (5), 05021001. [https://doi.org/10.1061/\(ASCE\)HY.1943-7900.0001880](https://doi.org/10.1061/(ASCE)HY.1943-7900.0001880).
- Boes, R. M. & Hager, W. H. 2003a Two-phase flow characteristics of stepped spillways. *Journal of Hydraulic Engineering* **129** (9), 661–670. [https://doi.org/10.1061/\(ASCE\)0733-9429\(2003\)129:9\(661\)](https://doi.org/10.1061/(ASCE)0733-9429(2003)129:9(661)).
- Boes, R. M. & Hager, W. H. 2003b Hydraulic design of stepped spillways. *Journal of Hydraulic Engineering* **129** (9), 671–679. [https://doi.org/10.1061/\(ASCE\)0733-9429\(2003\)129:9\(671\)](https://doi.org/10.1061/(ASCE)0733-9429(2003)129:9(671)).
- Chamani, M. R. & Rajaratnam, N. 1999 Onset of skimming flow on stepped spillways. *Journal of Hydraulic Engineering* **125** (9), 969–971. [https://doi.org/10.1061/\(ASCE\)0733-9429\(1999\)125:9\(969\)](https://doi.org/10.1061/(ASCE)0733-9429(1999)125:9(969)).
- Chanson, H. 1996 Prediction of the transition nappe/skimming flow on a stepped channel. *Journal of Hydraulic Research* **34** (3), 421–429. <https://doi.org/10.1080/00221689609498490>.
- Chanson, H. 2015 Discussion of ‘Cavitation potential of flow on stepped spillways’ by K. Warren Frizell, Floriana M. Renna, and Jorge Matos. *Journal of Hydraulic Engineering* **141** (5), 07014025. [https://doi.org/10.1061/\(ASCE\)HY.1943-7900.0000808](https://doi.org/10.1061/(ASCE)HY.1943-7900.0000808).
- Dong, Z. S., Wang, J. X., Vetsch, D. F., Boes, R. M. & Tan, G. M. 2019 Numerical simulation of air–water two-phase flow on stepped spillways behind X-shaped flaring gate piers under very high unit discharge. *Water* **11** (10), 1956. <https://doi.org/10.3390/w11101956>.
- Han, Y., Fen, R. L., Tian, J. N. & Li, B. L. 2006 Water-wing on steep slope of stepped spillways (in Chinese). *Journal of Hydroelectric Engineering* **25** (1), 114–118.
- Hunt, S. L. & Kadavy, K. C. 2017 Estimated splash and training wall height requirements for stepped chutes applied to embankment dams. *Journal of Hydraulic Engineering* **143** (11), 06017018. [https://doi.org/10.1061/\(ASCE\)HY.1943-7900.0001373](https://doi.org/10.1061/(ASCE)HY.1943-7900.0001373).
- Pfister, M., Hager, W. H. & Minor, H.-E. 2006a Bottom aeration of stepped spillways. *Journal of Hydraulic Engineering* **132** (8), 850–853. [https://doi.org/10.1061/\(ASCE\)0733-9429\(2006\)132:8\(850\)](https://doi.org/10.1061/(ASCE)0733-9429(2006)132:8(850)).
- Pfister, M., Hager, W. H. & Minor, H.-E. 2006b Stepped chutes: pre-aeration and spray reduction. *International Journal of Multiphase Flow* **32** (2), 269–284. <https://doi.org/10.1016/j.ijmultiphaseflow.2005.10.004>.
- Qian, S. T., Wu, J. H. & Ma, F. 2016 Hydraulic performance of ski-jump-step energy dissipater. *Journal of Hydraulic Engineering* **142** (10), 05016004. [https://doi.org/10.1061/\(ASCE\)HY.1943-7900.0001178](https://doi.org/10.1061/(ASCE)HY.1943-7900.0001178).
- Renna, F. M. & Fratino, U. 2010 Nappe flow over horizontal stepped chutes. *Journal of Hydraulic Research* **48** (5), 583–590. <https://doi.org/10.1080/00221686.2010.507016>.
- Silvestri, A., Erpicum, S., Archambeau, P., Dewals, B. & Piroton, M. 2013 Stepped spillway downstream of a piano key weir – critical length for uniform flow. In: *Proceedings of the International Workshop on Hydraulic Design of Low-Head Structures* (D. B. Bung & S. Pagliara, eds), Bundesanstalt für Wasserbau, Karlsruhe, Germany, pp. 99–107.
- Stojnic, I., Pfister, M., Matos, J. & Schleiss, A. J. 2021 Effect of 30-degree sloping smooth and stepped chute approach flow on the performance of a classical stilling basin. *Journal of Hydraulic Engineering* **147** (2), 04020097. [https://doi.org/10.1061/\(ASCE\)HY.1943-7900.0001840](https://doi.org/10.1061/(ASCE)HY.1943-7900.0001840).
- Tajabadi, F., Jabbari, E. & Sarkardeh, H. 2018 Effect of the end sill angle on the hydrodynamic parameters of a stilling basin. *The European Physical Journal Plus* **133** (1), 10. <https://doi.org/10.1140/epjp/i2018-11837-y>.
- Terrier, S., Pfister, M. & Schleiss, A. J. 2022 Performance and design of a stepped spillway aerator. *Water* **14** (2), 153. <https://doi.org/10.3390/w14020153>.
- Tullis, B. P., Jorgensen, T. J. & Crookston, B. M. 2021 Effects of a labyrinth weir with outlet ramps on downstream steep-stepped chute sidewall height requirements. *Journal of Irrigation and Drainage Engineering* **147** (12), 04021057. [https://doi.org/10.1061/\(ASCE\)IR.1943-4774.0001635](https://doi.org/10.1061/(ASCE)IR.1943-4774.0001635).
- Wang, J. B. & Chen, H. C. 2009 Experimental study of elimination of vortices along guide wall of bank spillway. In: *Advances in Water Resources and Hydraulic Engineering* (C. K. Zhang & H. W. Tang, eds), Springer, Berlin, Germany, pp. 2059–2063.
- Wehrmeister, E. & Ota, J. J. 2021 Separation in overflow spillways: a computational analysis. *Journal of Hydraulic Research* **60** (2), 357–362. <https://doi.org/10.1080/00221686.2021.1908438>.
- Wu, J. H., Zhou, Y. & Ma, F. 2018 Air entrainment of hydraulic jump aeration basin. *Journal of Hydrodynamics* **30** (5), 962–965. <https://doi.org/10.1007/s42241-018-0088-4>.
- Yu, D., Lee, J. H. W. & Wong, C. K. C. 2008 Stormwater overflow in stepped channel. *Journal of Hydro-Environment Research* **2** (2), 119–128. <https://doi.org/10.1016/j.jher.2008.05.004>.
- Zare, H. K. & Doering, J. C. 2012 Energy dissipation and flow characteristics of baffles and sills on stepped spillways. *Journal of Hydraulic Research* **50** (2), 192–199. <https://doi.org/10.1080/00221686.2012.659840>.
- Zhou, Y., Wu, J. H., Ma, F. & Hu, J. Y. 2020 Uniform flow and energy dissipation of hydraulic-jump-stepped spillways. *Water Supply* **20** (4), 1546–1553. <https://doi.org/10.2166/ws.2020.056>.
- Zhou, Y., Wu, J. H., Ma, F. & Qian, S. T. 2021 Experimental investigation of the hydraulic performance of a hydraulic-jump-stepped spillway. *KSCE Journal of Civil Engineering* **25** (10), 3758–3765. <https://doi.org/10.1007/s12205-021-1709-y>.
